# Supplementary material
Source: Research Square preprint supplement (doi:10.21203/rs.3.rs-7967522/v1)
Supplement: Supplementary file 3 [file f811d848ab3edf4a1bd8f421.pdf]

## checkCIF (basic structural check) running

---

Checking for embedded fcf data in CIF ...

Found embedded fcf data in CIF. Extracting fcf data from uploaded CIF, please wait .....

## checkCIF/PLATON (basic structural check)

---

Structure factors have been supplied for datablock(s) EJC\_05\_177\_Et2OPent\_0m

THIS REPORT IS FOR GUIDANCE ONLY. IF USED AS PART OF A REVIEW PROCEDURE FOR PUBLICATION, IT SHOULD NOT REPLACE THE EXPERTISE OF AN EXPERIENCED CRYSTALLOGRAPHIC REFEREE.

No syntax errors found. [CIF dictionary](#)

Please wait while processing .... [Interpreting this report](#)

[Structure factor report](#)

## Datablock: EJC\_05\_177\_Et2OPent\_0m

---

|                        |                                                      |                     |
|------------------------|------------------------------------------------------|---------------------|
| Bond precision:        | C-C = 0.0035 A                                       | Wavelength=0.71073  |
| Cell:                  | a=23.0613(9)      b=21.5918(8)      c=31.8077(12)    |                     |
|                        | alpha=90          beta=90          gamma=90          |                     |
| Temperature:           | 150 K                                                |                     |
|                        | Calculated                                           | Reported            |
| Volume                 | 15838.2(10)                                          | 15838.2(10)         |
| Space group            | I b c a                                              | I b c a             |
| Hall group             | -I 2b 2c                                             | -I 2b 2c            |
| Moiety formula         | C76 H125 K4 N5 O4 U                                  | ?                   |
| Sum formula            | C76 H125 K4 N5 O4 U                                  | C76 H125 K4 N5 O4 U |
| Mr                     | 1567.24                                              | 1567.23             |
| Dx, g cm <sup>-3</sup> | 1.314                                                | 1.315               |
| Z                      | 8                                                    | 8                   |
| Mu (mm <sup>-1</sup> ) | 2.307                                                | 2.307               |
| F000                   | 6528.0                                               | 6528.0              |
| F000'                  | 6459.14                                              |                     |
| h,k,lmax               | 32,29,44                                             | 32,29,44            |
| Nref                   | 11106                                                | 11097               |
| Tmin,Tmax              | 0.637,0.630                                          | 0.503,0.570         |
| Tmin'                  | 0.624                                                |                     |
| Correction method=     | # Reported T Limits: Tmin=0.503 Tmax=0.570 AbsCorr = |                     |
| MULTI-SCAN             |                                                      |                     |
| Data completeness=     | 0.999          Theta(max)= 29.573                    |                     |
| R(reflections)=        | 0.0248( 8978)          wR2(reflections)= 0.0572(     |                     |
|                        |                                                      | 11097)              |
| S =                    | 1.076          Npar= 422                             |                     |

The following ALERTS were generated. Each ALERT has the format

**test-name\_ALERT\_alert-type\_alert-level.**

Click on the hyperlinks for more details of the test.

### Alert level C

[PLAT220\\_ALERT\\_2\\_C](#) NonSolvent Resd 1 C Ueq(max)/Ueq(min) Range 5.3 Ratio

[PLAT222\\_ALERT\\_3\\_C](#) NonSolvent Resd 1 H Uiso(max)/Uiso(min) Range 4.4 Ratio

[PLAT230\\_ALERT\\_2\\_C](#) Hirshfeld Test Diff for N1 --C1 . 5.9 s.u.

[PLAT905\\_ALERT\\_3\\_C](#) Negative K value in the Analysis of Variance ... -1.518 Report

[PLAT910\\_ALERT\\_3\\_C](#) Missing FCF Reflection(s) Below Theta(Min)[Deg]= 2.56 Note

0 2 0, 2 0 0, 1 2 1, 2 1 1, 0 0 2, 0 2 2,

1 1 2, 2 0 2,

PLAT971\_ALERT\_2\_C Check Calcd Resid. Dens. 2.21Ang From C26 2.10 eA-3

PLAT975\_ALERT\_2\_C Check Calcd Resid. Dens. 0.82Ang From N3 0.52 eA-3

**Alert level G**

PLAT083\_ALERT\_2\_G SHELXL Second Parameter in WGHT Unusually Large 54.01 Why ?

PLAT232\_ALERT\_2\_G Hirshfeld Test Diff (M-X) U1 --N2 . 6.9 s.u.

PLAT232\_ALERT\_2\_G Hirshfeld Test Diff (M-X) U1 --N3 . 8.5 s.u.

PLAT303\_ALERT\_2\_G Full Occupancy Atom H16A with # Connections 2.00 Check

**And 3 other PLAT303 Alerts**

More ...

PLAT343\_ALERT\_2\_G Unusual Angle Range in Main Residue for C8 Check

PLAT764\_ALERT\_4\_G Overcomplete CIF Bond List Detected (Rep/Expd) . 1.26 Ratio

PLAT779\_ALERT\_4\_G Suspect or Irrelevant (Bond) Angle(s) in CIF ... 40.60 Deg.

K1 -C17 -H17B 1\_555 1\_555 1\_555 ..... # 257 Check

**And 3 other PLAT779 Alerts**

More ...

PLAT793\_ALERT\_4\_G Model has Chirality at C15 (Centro SpGr) R Verify

**And 3 other PLAT793 Alerts**

More ...

PLAT933\_ALERT\_2\_G Number of HKL-OMIT Records in Embedded .res File 2 Note

0 4 0, 2 0 2,

PLAT969\_ALERT\_5\_G The 'Henn et al.' R-Factor-gap value ..... 3.931 Note

Predicted wR2: Based on SigI\*\*2 1.46 or SHELX Weight 5.32

PLAT978\_ALERT\_2\_G Number C-C Bonds with Positive Residual Density. 6 Info

- 0 **ALERT level A** = Most likely a serious problem - resolve or explain  
 0 **ALERT level B** = A potentially serious problem, consider carefully  
 7 **ALERT level C** = Check. Ensure it is not caused by an omission or oversight  
 20 **ALERT level G** = General information/check it is not something unexpected

- 0 ALERT type 1 CIF construction/syntax error, inconsistent or missing data  
 14 ALERT type 2 Indicator that the structure model may be wrong or deficient  
 3 ALERT type 3 Indicator that the structure quality may be low  
 9 ALERT type 4 Improvement, methodology, query or suggestion  
 1 ALERT type 5 Informative message, check

It is advisable to attempt to resolve as many as possible of the alerts in all categories. Often the minor alerts point to easily fixed oversights, errors and omissions in your CIF or refinement strategy, so attention to these fine details can be worthwhile. In order to resolve some of the more serious problems it may be necessary to carry out additional measurements or structure refinements. However, the purpose of your study may justify the reported deviations and the more serious of these should normally be commented upon in the discussion or experimental section of a paper or in the "special\_details" fields of the CIF. checkCIF was carefully designed to identify outliers and unusual parameters, but every test has its limitations and alerts that are not important in a particular case may appear. Conversely, the absence of alerts does not guarantee there are no aspects of the results needing attention. It is up to the individual to critically assess their own results and, if necessary, seek expert advice.

**Publication of your CIF in IUCr journals**

A basic structural check has been run on your CIF. These basic checks will be run on all CIFs submitted for publication in IUCr journals (*Acta Crystallographica*, *Journal of Applied Crystallography*, *Journal of Synchrotron Radiation*); however, if you intend to submit to *Acta Crystallographica Section C* or *E* or *IUCrData*, you should make sure that **full publication checks** are run on the final version of your CIF prior to submission.

**Publication of your CIF in other journals**

Please refer to the *Notes for Authors* of the relevant journal for any special instructions relating to CIF submission.

PLATON version of 04/06/2025; check.def file version of 30/05/2025

**Datablock EJC\_05\_177\_Et2OPent\_0m - ellipsoid plot**

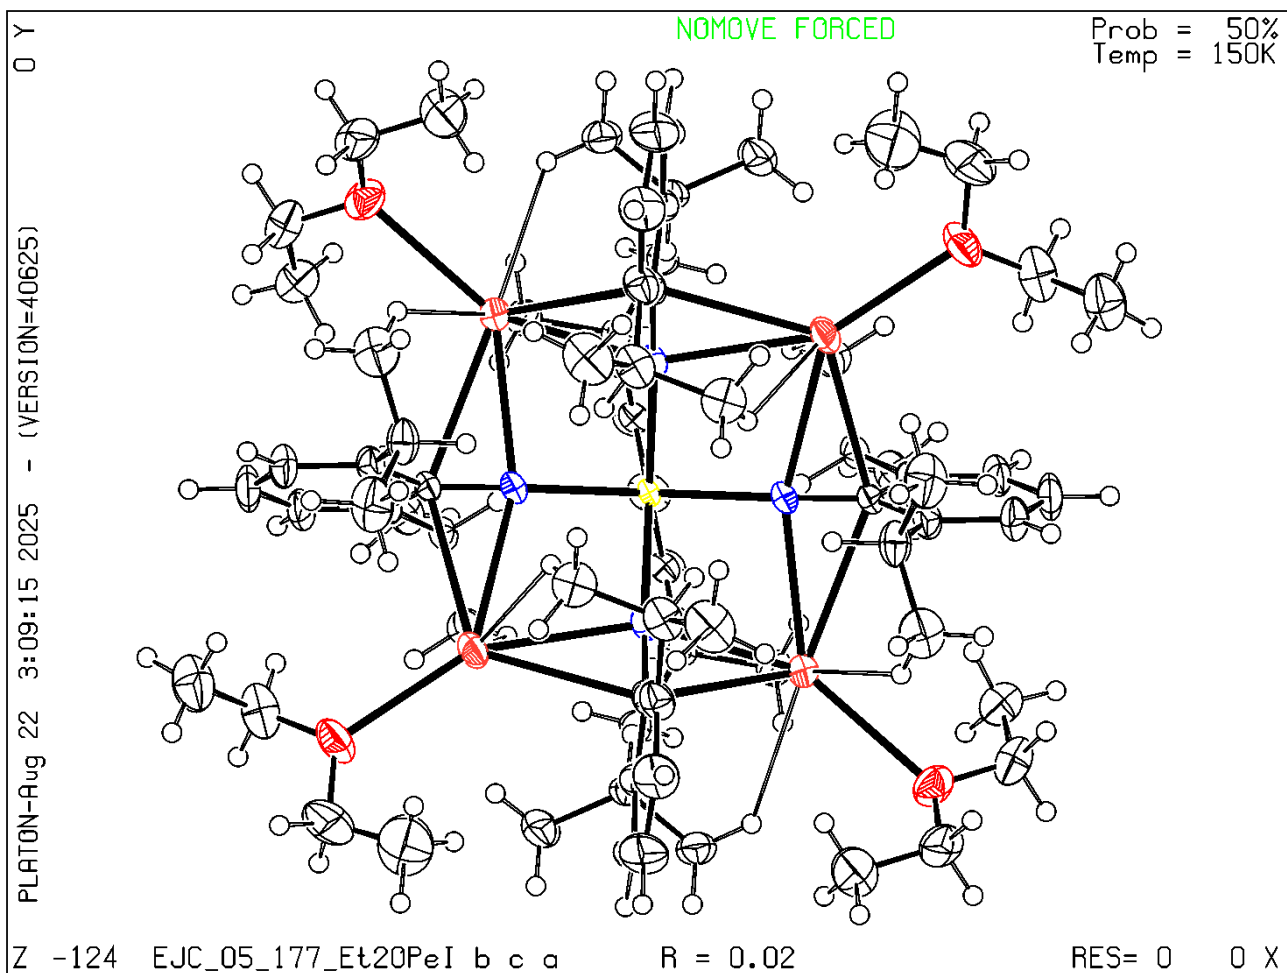

[Download CIF editor \(pubCIF\) from the IUCr](#)  
[Download CIF editor \(enCIFer\) from the CCDC](#)  
[Test a new CIF entry](#)
